# Supplementary material for: Fundamentals of Magneto-Optical Spectroscopy
Source: Frontiers journal article supplement (doi:10.3389/fphy.2022.946515), 2022-10-11
Supplement: Data_Sheet_1.pdf [file Data_Sheet_1.pdf]

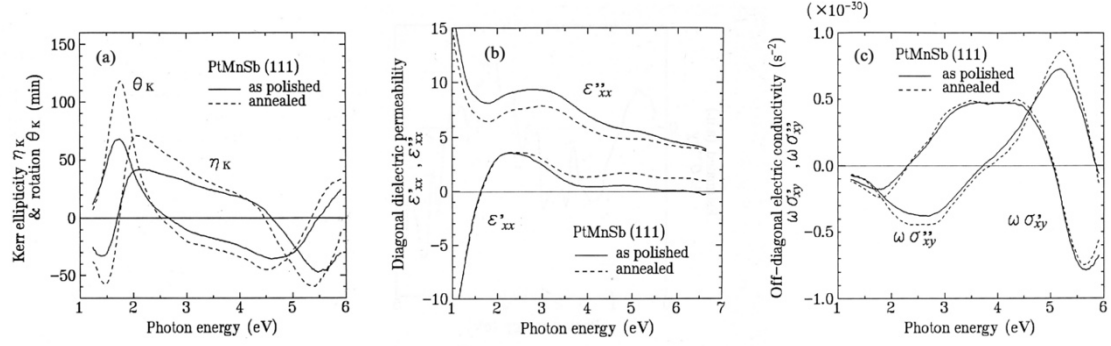

FIGURE S1 (a) Magneto-optical Kerr rotation and ellipticity spectra, and (b) spectra of real and imaginary parts and (c) spectra of real and imaginary parts of off-diagonal element of the dielectric permeability tensor in the as polished (solid line) and annealed (dotted line) {111} surfaces of a PtMnSb single crystal.
